# Supplementary material for: Investigation of Fe2N@carbon encapsulated in N-doped graphene-like carbon as a catalyst in sustainable zinc–air batteries
Source: Royal Society of Chemistry journal article supplement (doi:10.1039/c7cy01721a), 2017-01-01
Supplement: c7cy01721a1.pdf [file c7cy01721a1.pdf]

### Electronic supplementary information (ESI)

#### Investigation of Fe<sub>2</sub>N@Carbon encapsulated in N-doped graphene-like carbon as a catalyst in sustainable zinc-air batteries

Zhao-Yang Chen,<sup>a,b</sup> Ya-Nan Li,<sup>a,b</sup> Ling-Li Lei,<sup>a,b</sup> Shu-Juan Bao<sup>a,b,\*</sup> Min-Qiang Wang,<sup>a,b</sup> Heng-Liu,<sup>a,b</sup> Zhi-Liang Zhao,<sup>a,b</sup> and Mao-wen Xu<sup>a,b</sup>,

<sup>a</sup> Institute for Clean energy & Advanced Materials, Faculty of Materials & Energy, Southwest University, Chongqing, China

<sup>b</sup> Chongqing Key Laboratory for Advanced Materials and Technologies of Clean Energies, Chongqing, China

\* Corresponding author. E-mail: [baoshj@swu.edu.cn](mailto:baoshj@swu.edu.cn)

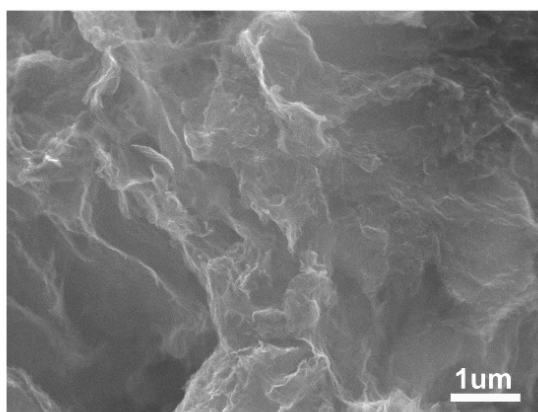

Fig. S1 FESEM images of NG.

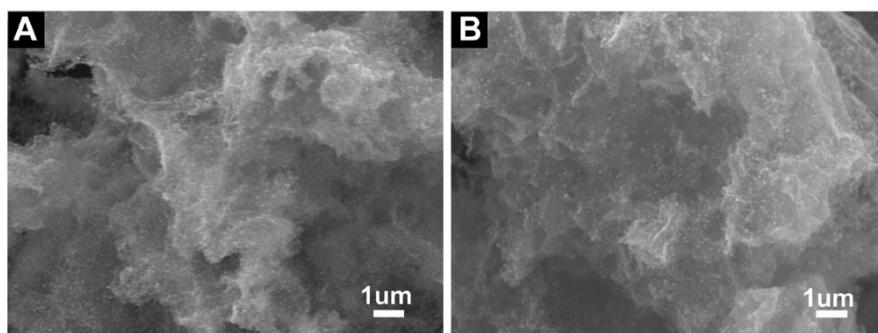

Fig. S2 FESEM images of  $\text{Fe}_3\text{C}/\text{NG}$ .

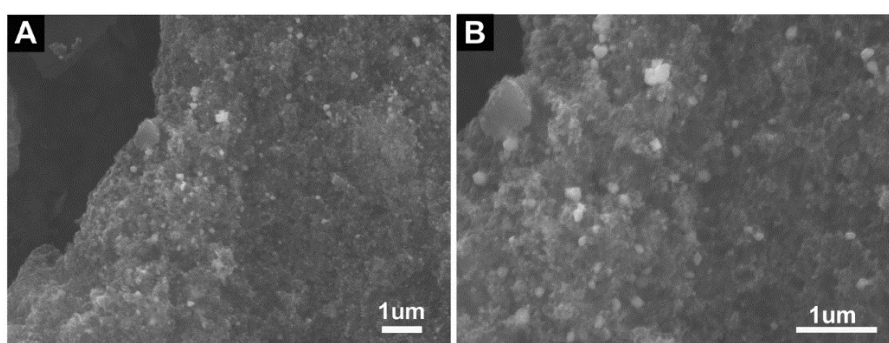

Fig. S3 FESEM images of  $\text{Fe}_2\text{N}/\text{NG}$  without adding melamine.

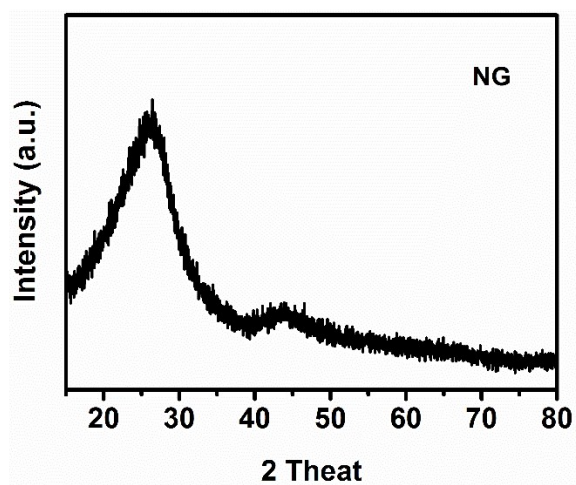

Fig. S4 XRD patterns of NG.

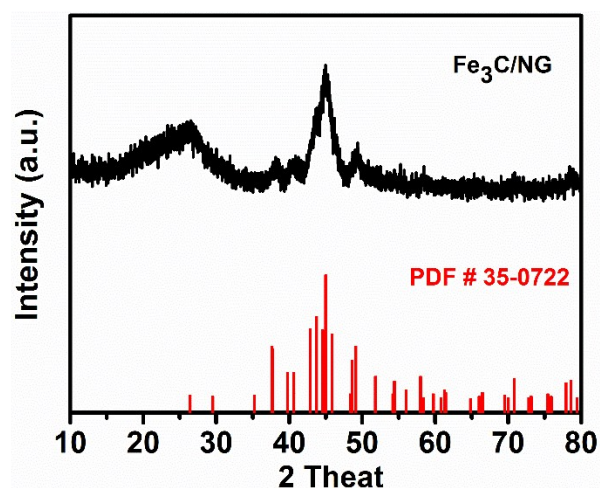

Fig. S5 XRD patterns of Fe<sub>3</sub>C/NG.

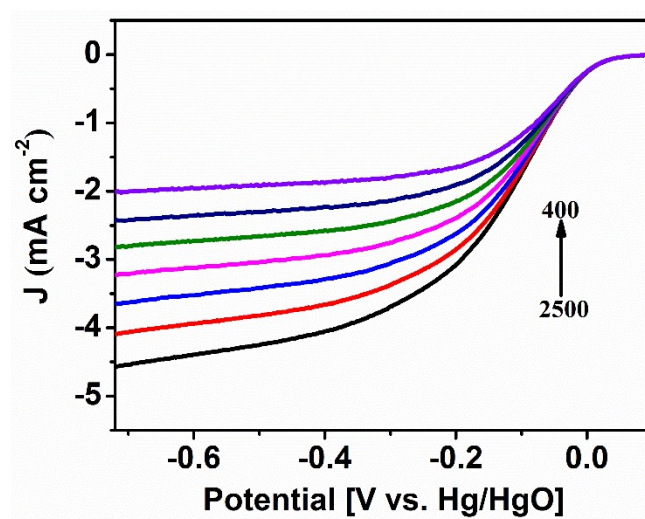

Fig. S6 The different rotation rates of Fe<sub>3</sub>C/NG.

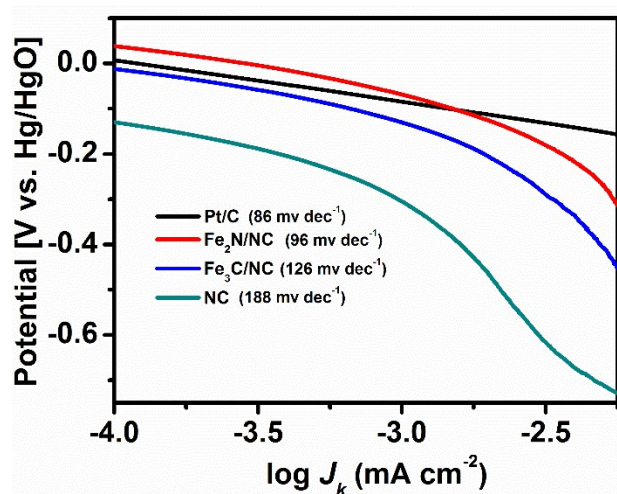

Fig. S7. Tafel plots of the four samples.

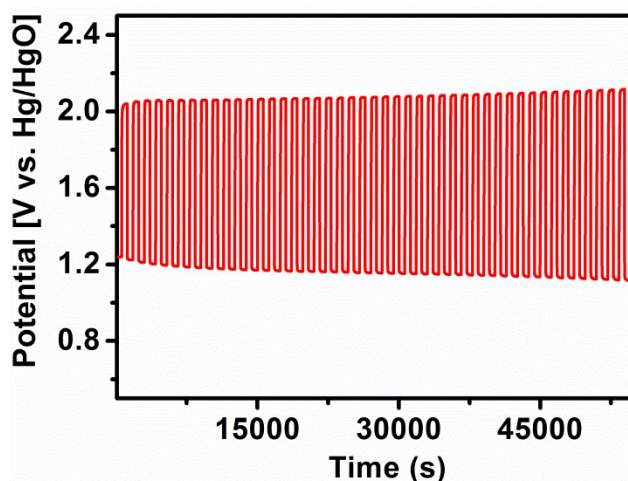

Fig. S8. The discharge and charge voltage of profiles of Zn-air batteries with  $\text{Fe}_2\text{N/NC}$ .

### Material characterizations and electrochemical measurements

The crystal structure of the prepared catalysts were characterized by powder X-ray diffractometer (XRD, Shimadzu XRD-7000). Transmission electron microscopy (TEM, Jeol-2100, Japan) and field emission scanning electron microscopy (FESEM, JSM-7800F, Japan) were used to characterize the physical morphology of the catalysts. X-ray photoelectron spectroscopy (XPS, Escalab 250xi, USA) was used to analyze the surface properties. Raman spectra were obtained with a LabRAM HR Evolution. The thermal properties analysis of the samples was studied by a Thermo Gravimetric Analyzer(TGA,Q50,USA). The electrochemical measurements were

performed in a three-electrode system by using a CHI 660 electrochemical workstation (CHI Instruments Inc.) and Autolab potentiostat (PGSTAT302N) system coupled with a Pinerotator (AFMS-LXF) in 0.1 M KOH with Hg/HgO and Pt foils as reference electrode and counter electrode. For Cyclic voltammetry (CV) experiment, 5 uL catalysts ink (2mg mL<sup>-1</sup>) was loaded on a modified glassy carbon electrode(GCE) (diameter 3.0 mm) substrate as the working electrode. For the rotating ring disk electrode (RRDE) test, 25 uL catalysts ink (2mg mL<sup>-1</sup>) was dropped onto the RRDE of 5.6 mm in diameter. After drying at room temperature, it was coated with a thin film of 0.5 % of Nafion solution. All the electrochemical tests were conducted at room temperature.

**Koutecky-Levich (K-L) equations:**

$$J^{-1} = J_L^{-1} + J_K^{-1} = (B\omega^{1/2})^{-1} + J_K^{-1} \quad (1)$$

$$B = 0.62nFC_0(D_0)^{2/3}\nu^{-1/6} \quad (2)$$

where J is the measured kinetic density,  $J_k$  is the kinetic current density,  $J_d$  is the diffusion-limiting current density,  $\omega$  is the angular velocity of the disk in rad s<sup>-1</sup> ( $\omega = 2\pi N/60$ , N = rotation speed in rpm), F is the Faraday constant (96485 C mol<sup>-1</sup>), D is the diffusion coefficient of O<sub>2</sub> in the electrolyte (1.90×10<sup>-5</sup> cm<sup>2</sup> s<sup>-1</sup>),  $\nu$  is the kinematic viscosity of the electrolyte (0.01 cm<sup>2</sup> s<sup>-1</sup>),  $C_0$  is the bulk concentration of O<sub>2</sub> in the electrolyte (1.20 × 10<sup>-6</sup> mol cm<sup>-3</sup>).

The electron transfer number (n) calculated from the RRDE measurement was based on the disk current (J<sub>Disk</sub>) and ring current (J<sub>Ring</sub>) via the following equation<sup>[1]</sup>:

$$n = 4I_{\text{Disk}}/(I_{\text{Disk}} + I_{\text{Ring}}/N)$$

where N = 0.37 is the current collection efficiency of Pt ring
